# Supplementary material for: New records of a lost species and a geographic range expansion for sengis in the Horn of Africa
Source: PeerJ journal article supplement (doi:10.7717/peerj.9652), 2020-08-18
Supplement: Supplemental_Data_S3_v2.zip [file Supplemental_Data_S3_v2.zip]

Values at internal tree nodes are posterior probability of lineage splits.

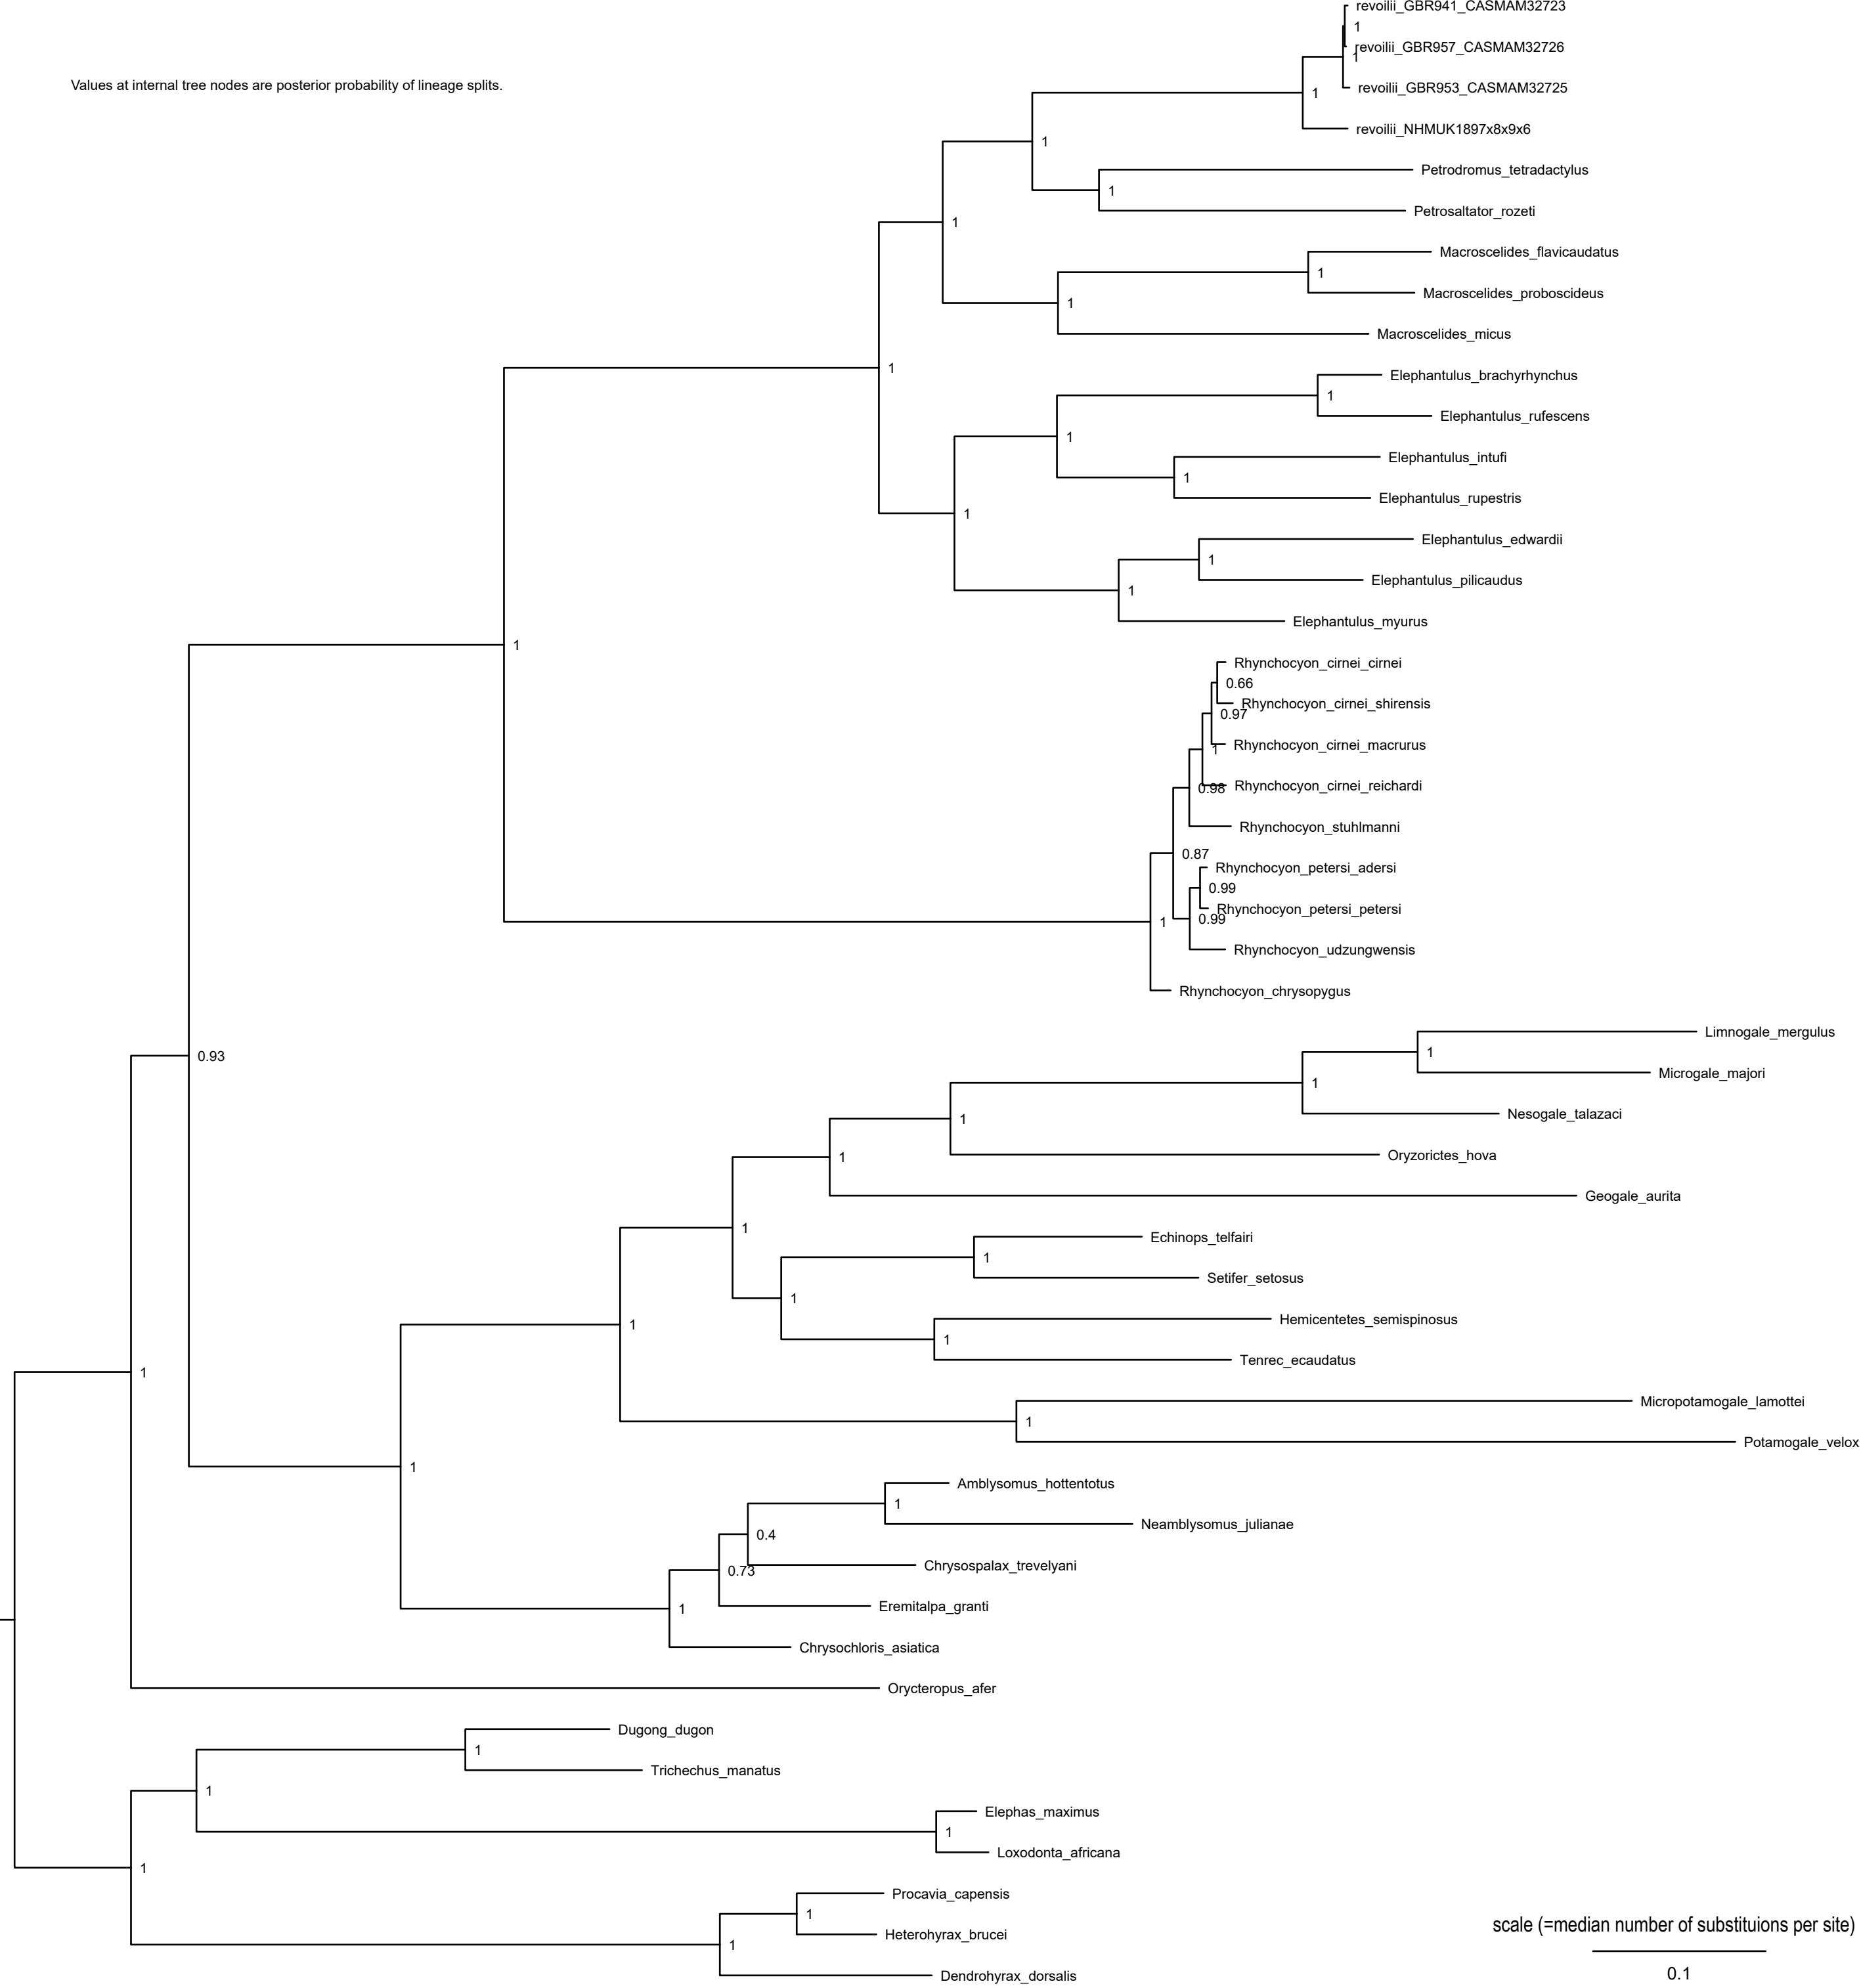

Genetic distance matrix reporting percent identity of macroscelidean DNA sequences using the six-locus supermatrix alignment.

|                              | revoliil_GBR941_CASMAM32723 | revoliil_GBR953_CASMAM32725 | revoliil_GBR957_CASMAM32726 | revoliil_NHMUK1897x8x9x6 | Petrodromus_tetradactylus | Petrosaltator_rozeti | Macroscelides_micus | Macroscelides_flavicaudatus | Macroscelides_proboscideus | Elephantulus_brachyrhynchus | Elephantulus_edwardii | Elephantulus_intufi | Elephantulus_myurus | Elephantulus_pilicaudus | Elephantulus_rufescens | Elephantulus_rupestris | Rhynchocyon_chrysopygus | Rhynchocyon_cirnei_cirnei | Rhynchocyon_cirnei_macrurus | Rhynchocyon_cirnei_reichardi | Rhynchocyon_cirnei_shirensis | Rhynchocyon_petersi_adersi | Rhynchocyon_petersi_petersi | Rhynchocyon_stuhlmanni | Rhynchocyon_udzungwensis |
|------------------------------|-----------------------------|-----------------------------|-----------------------------|--------------------------|---------------------------|----------------------|---------------------|-----------------------------|----------------------------|-----------------------------|-----------------------|---------------------|---------------------|-------------------------|------------------------|------------------------|-------------------------|---------------------------|-----------------------------|------------------------------|------------------------------|----------------------------|-----------------------------|------------------------|--------------------------|
| revoliil_GBR941_CASMAM32723  | 100.00                      |                             |                             |                          |                           |                      |                     |                             |                            |                             |                       |                     |                     |                         |                        |                        |                         |                           |                             |                              |                              |                            |                             |                        |                          |
| revoliil_GBR953_CASMAM32725  | 99.41                       | 100.00                      |                             |                          |                           |                      |                     |                             |                            |                             |                       |                     |                     |                         |                        |                        |                         |                           |                             |                              |                              |                            |                             |                        |                          |
| revoliil_GBR957_CASMAM32726  | 99.77                       | 99.49                       | 100.00                      |                          |                           |                      |                     |                             |                            |                             |                       |                     |                     |                         |                        |                        |                         |                           |                             |                              |                              |                            |                             |                        |                          |
| revoliil_NHMUK1897x8x9x6     | 88.66                       | 88.77                       | 88.72                       | 100.00                   |                           |                      |                     |                             |                            |                             |                       |                     |                     |                         |                        |                        |                         |                           |                             |                              |                              |                            |                             |                        |                          |
| Petrodromus_tetradactylus    | 65.05                       | 64.95                       | 65.09                       | 83.26                    | 100.00                    |                      |                     |                             |                            |                             |                       |                     |                     |                         |                        |                        |                         |                           |                             |                              |                              |                            |                             |                        |                          |
| Petrosaltator_rozeti         | 64.85                       | 64.74                       | 64.88                       | 83.64                    | 86.78                     | 100.00               |                     |                             |                            |                             |                       |                     |                     |                         |                        |                        |                         |                           |                             |                              |                              |                            |                             |                        |                          |
| Macroscelides_micus          | 65.23                       | 65.09                       | 65.23                       | 81.82                    | 84.36                     | 88.10                | 100.00              |                             |                            |                             |                       |                     |                     |                         |                        |                        |                         |                           |                             |                              |                              |                            |                             |                        |                          |
| Macroscelides_flavicaudatus  | 64.66                       | 64.63                       | 64.70                       | 81.75                    | 85.01                     | 88.38                | 89.97               | 100.00                      |                            |                             |                       |                     |                     |                         |                        |                        |                         |                           |                             |                              |                              |                            |                             |                        |                          |
| Macroscelides_proboscideus   | 83.56                       | 83.46                       | 83.57                       | 81.92                    | 64.59                     | 67.23                | 69.15               | 72.31                       | 100.00                     |                             |                       |                     |                     |                         |                        |                        |                         |                           |                             |                              |                              |                            |                             |                        |                          |
| Elephantulus_brachyrhynchus  | 52.67                       | 52.60                       | 52.71                       | 88.98                    | 76.65                     | 72.24                | 71.32               | 71.60                       | 51.24                      | 100.00                      |                       |                     |                     |                         |                        |                        |                         |                           |                             |                              |                              |                            |                             |                        |                          |
| Elephantulus_edwardii        | 55.47                       | 55.40                       | 55.41                       | 80.48                    | 64.23                     | 64.68                | 65.68               | 64.90                       | 50.62                      | 55.69                       | 100.00                |                     |                     |                         |                        |                        |                         |                           |                             |                              |                              |                            |                             |                        |                          |
| Elephantulus_intufi          | 60.72                       | 60.61                       | 60.75                       | 84.12                    | 84.97                     | 80.83                | 80.17               | 80.52                       | 61.03                      | 82.03                       | 63.02                 | 100.00              |                     |                         |                        |                        |                         |                           |                             |                              |                              |                            |                             |                        |                          |
| Elephantulus_myurus          | 53.68                       | 53.55                       | 53.71                       | 81.71                    | 72.07                     | 72.27                | 73.53               | 72.95                       | 56.25                      | 58.21                       | 54.34                 | 69.25               | 100.00              |                         |                        |                        |                         |                           |                             |                              |                              |                            |                             |                        |                          |
| Elephantulus_pilicaudus      | 47.99                       | 47.97                       | 47.97                       | 88.15                    | 73.10                     | 67.43                | 66.13               | 66.57                       | 44.96                      | 84.47                       | 75.09                 | 77.25               | 50.75               | 100.00                  |                        |                        |                         |                           |                             |                              |                              |                            |                             |                        |                          |
| Elephantulus_rufescens       | 66.10                       | 66.04                       | 66.10                       | 82.28                    | 80.14                     | 82.50                | 83.58               | 83.29                       | 64.36                      | 77.77                       | 68.75                 | 79.23               | 71.20               | 67.77                   | 100.00                 |                        |                         |                           |                             |                              |                              |                            |                             |                        |                          |
| Elephantulus_rupestris       | 62.22                       | 62.09                       | 62.24                       | 82.97                    | 85.12                     | 81.57                | 80.71               | 80.84                       | 61.82                      | 76.89                       | 63.78                 | 85.20               | 70.73               | 75.34                   | 79.05                  | 100.00                 |                         |                           |                             |                              |                              |                            |                             |                        |                          |
| Rhynchocyon_chrysopygus      | 30.11                       | 30.01                       | 30.17                       | 53.02                    | 42.27                     | 42.48                | 43.15               | 42.68                       | 30.98                      | 44.59                       | 22.52                 | 43.71               | 56.53               | 34.02                   | 41.86                  | 42.47                  | 100.00                  |                           |                             |                              |                              |                            |                             |                        |                          |
| Rhynchocyon_cirnei_cirnei    | 50.56                       | 50.47                       | 50.64                       | 78.09                    | 67.66                     | 67.85                | 68.65               | 68.19                       | 52.34                      | 54.02                       | 49.26                 | 64.05               | 84.15               | 46.43                   | 65.27                  | 65.53                  | 65.84                   | 100.00                    |                             |                              |                              |                            |                             |                        |                          |
| Rhynchocyon_cirnei_macrurus  | 51.27                       | 51.16                       | 51.34                       | 78.14                    | 64.92                     | 64.93                | 66.29               | 65.40                       | 50.98                      | 53.34                       | 50.26                 | 61.47               | 82.23               | 46.50                   | 66.78                  | 62.77                  | 64.54                   | 94.73                     | 100.00                      |                              |                              |                            |                             |                        |                          |
| Rhynchocyon_cirnei_reichardi | 50.32                       | 50.23                       | 50.40                       | 77.81                    | 67.76                     | 67.81                | 68.75               | 68.11                       | 52.27                      | 54.15                       | 49.18                 | 64.00               | 84.22               | 46.47                   | 65.30                  | 65.57                  | 65.68                   | 99.39                     | 94.45                       | 100.00                       |                              |                            |                             |                        |                          |
| Rhynchocyon_cirnei_shirensis | 62.14                       | 62.00                       | 62.14                       | 64.02                    | 58.64                     | 59.61                | 61.93               | 60.21                       | 60.97                      | 64.26                       | 60.87                 | 61.26               | 66.21               | 64.86                   | 61.89                  | 60.31                  | 92.70                   | 72.78                     | 72.71                       | 72.23                        | 100.00                       |                            |                             |                        |                          |
| Rhynchocyon_petersi_adersi   | 65.79                       | 65.66                       | 65.79                       | 67.72                    | 62.46                     | 63.50                | 65.72               | 64.34                       | 65.24                      | 68.47                       | 64.60                 | 65.12               | 66.21               | 68.77                   | 65.82                  | 63.84                  | 97.98                   | 75.88                     | 75.81                       | 75.53                        | 93.46                        | 100.00                     |                             |                        |                          |
| Rhynchocyon_petersi_petersi  | 57.56                       | 57.44                       | 57.63                       | 78.14                    | 59.61                     | 59.77                | 60.51               | 60.15                       | 59.91                      | 46.46                       | 44.30                 | 57.11               | 72.35               | 38.44                   | 58.37                  | 57.69                  | 53.96                   | 85.21                     | 81.47                       | 84.95                        | 71.81                        | 76.71                      | 100.00                      |                        |                          |
| Rhynchocyon_stuhlmanni       | 50.13                       | 50.06                       | 50.22                       | 78.69                    | 66.87                     | 67.06                | 68.19               | 67.30                       | 51.91                      | 54.75                       | 49.07                 | 64.45               | 83.55               | 47.03                   | 64.92                  | 64.85                  | 66.68                   | 97.59                     | 93.34                       | 97.54                        | 72.51                        | 75.85                      | 83.62                       | 100.00                 |                          |
| Rhynchocyon_udzungwensis     | 61.34                       | 61.24                       | 61.39                       | 77.70                    | 78.58                     | 82.44                | 82.93               | 82.71                       | 63.23                      | 68.30                       | 62.57                 | 75.02               | 68.47               | 64.39                   | 79.18                  | 75.45                  | 50.21                   | 80.48                     | 77.17                       | 80.32                        | 71.26                        | 75.60                      | 71.32                       | 79.13                  | 100.00                   |
