# Supplementary material for: New records of a lost species and a geographic range expansion for sengis in the Horn of Africa
Source: PeerJ journal article supplement (doi:10.7717/peerj.9652), 2020-08-18

Blue bars underlying tree nodes represent 95% Highest Posterior Density ranges of divergence age estimates. Values at internal tree nodes are median estimates (in millions of years) and [Min,Max] of the 95HPD range.

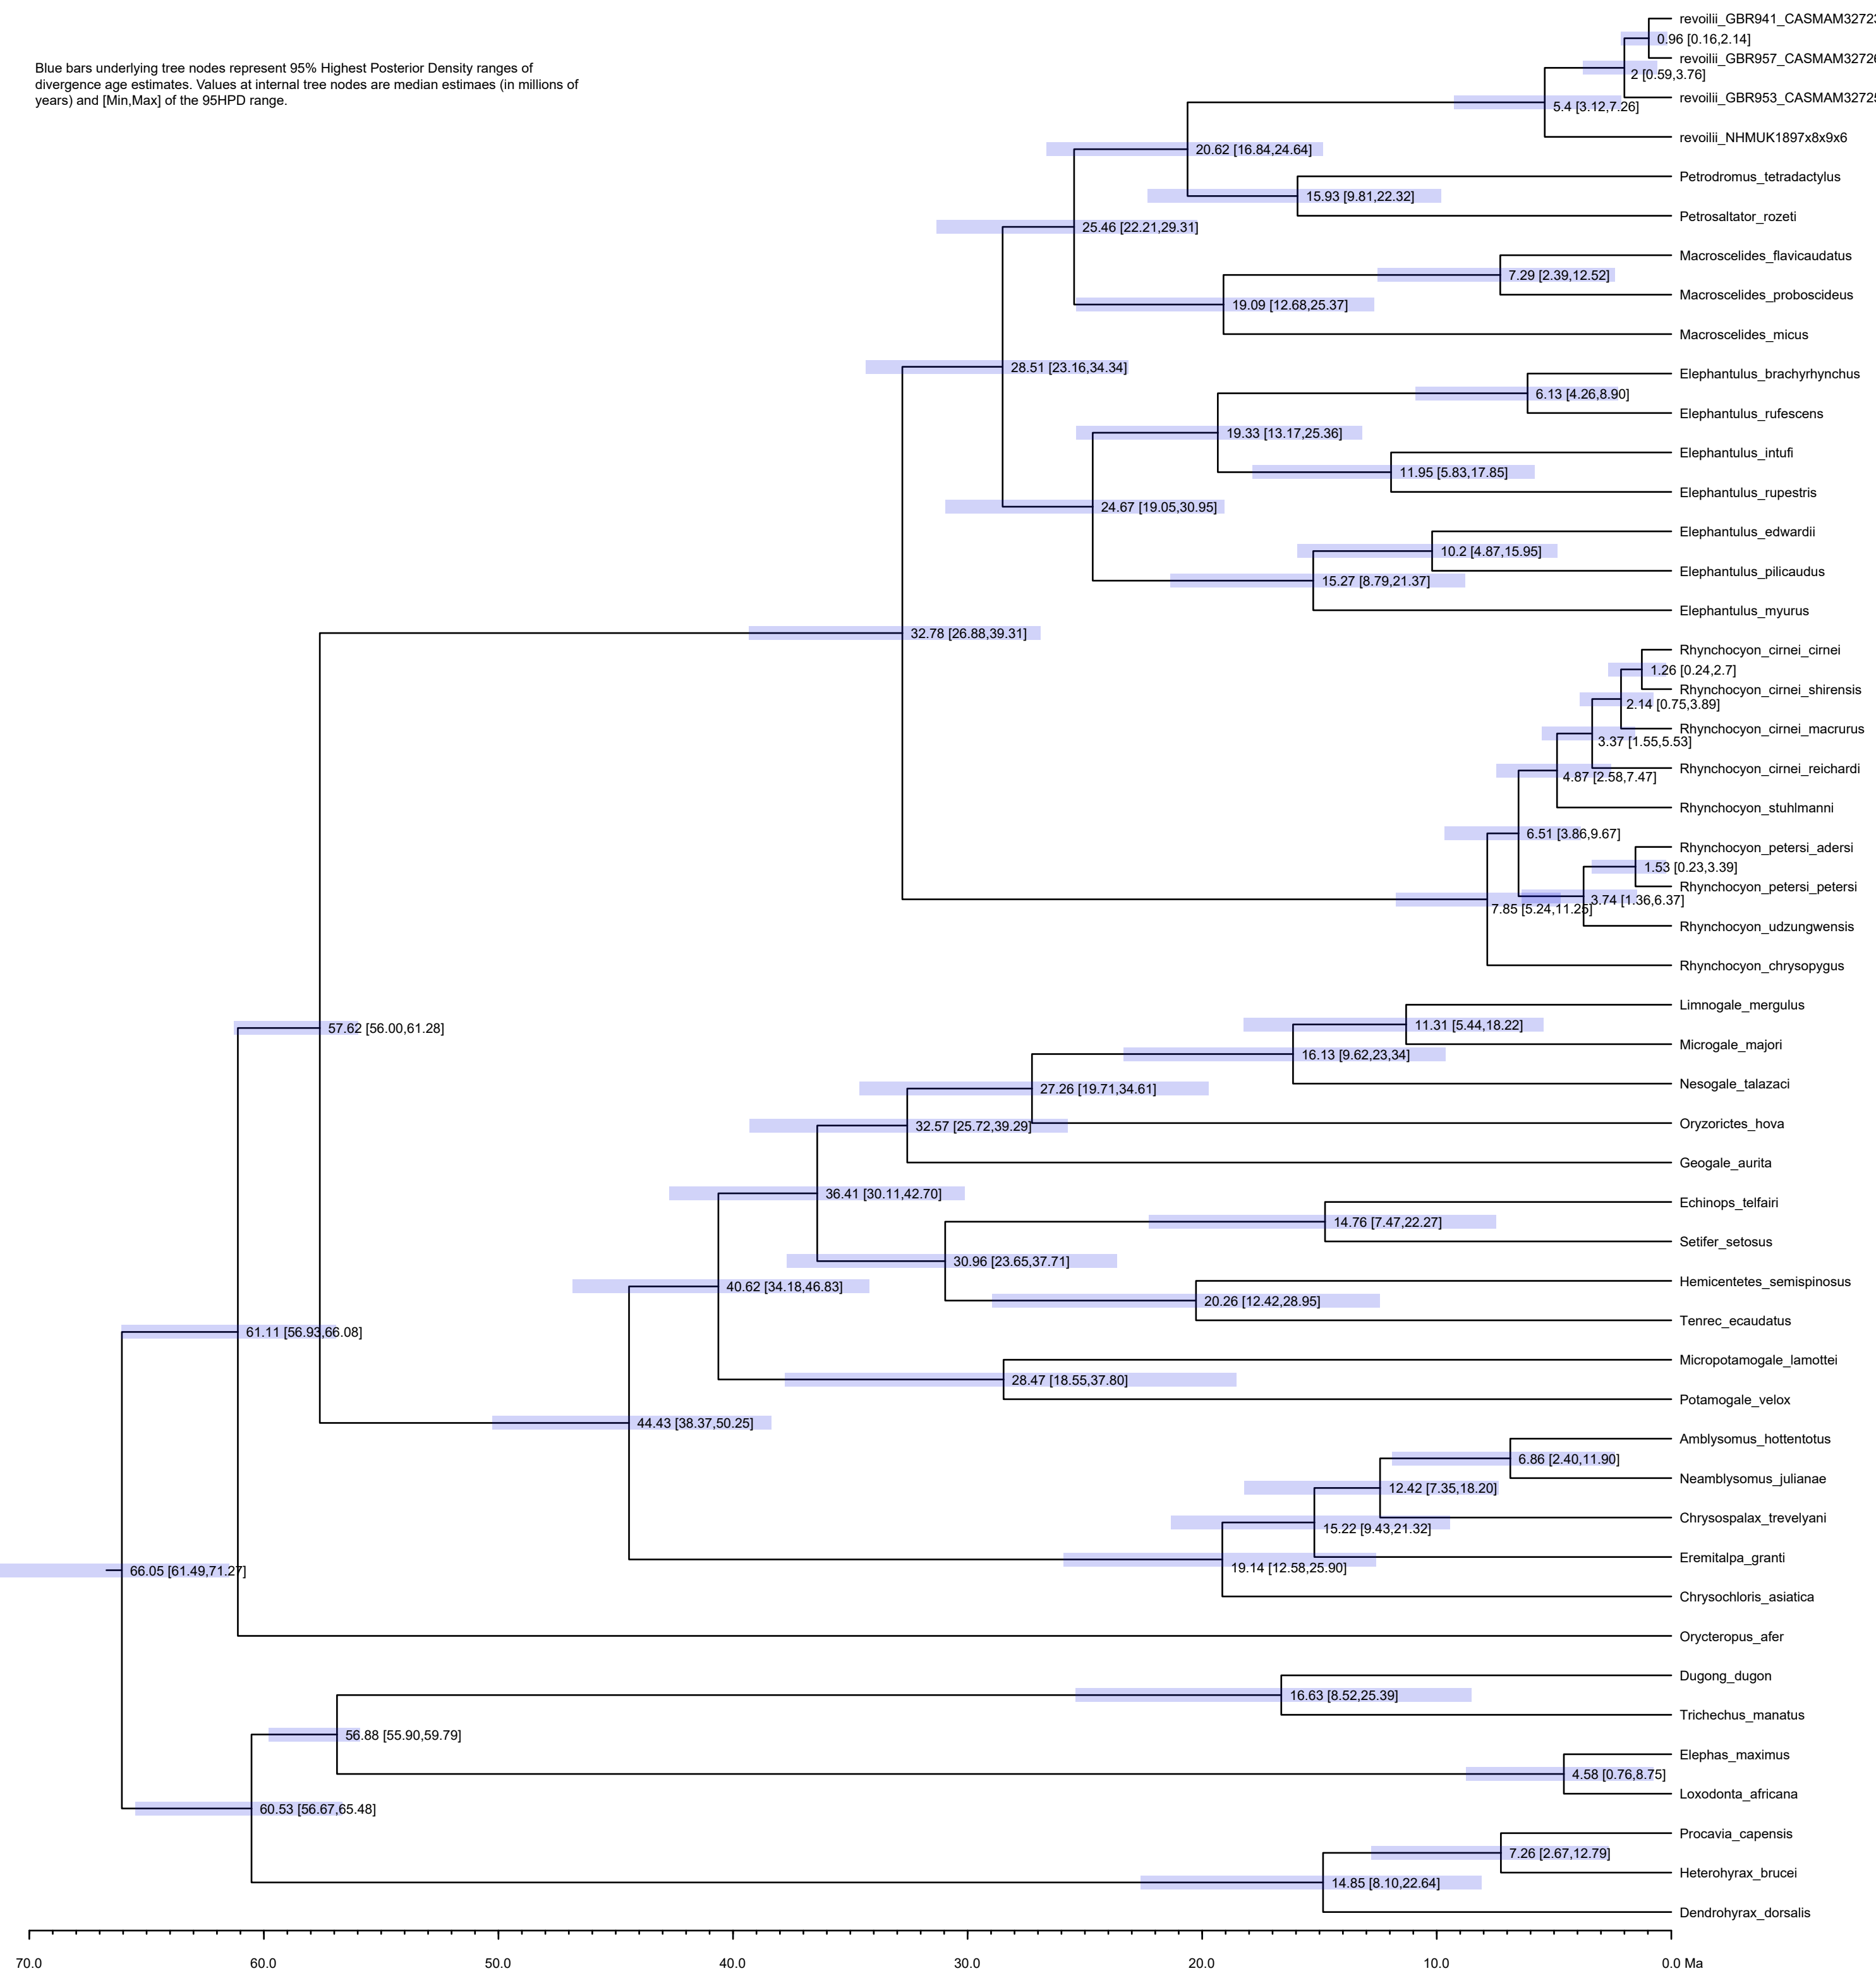

Supplement: Supplemental_Data_S3_v2.zip [file Supplemental_Data_S3_v2.zip]
