# Supplementary figures and images for: New records of a lost species and a geographic range expansion for sengis in the Horn of Africa
Source: PeerJ journal article supplement (doi:10.7717/peerj.9652), 2020-08-18

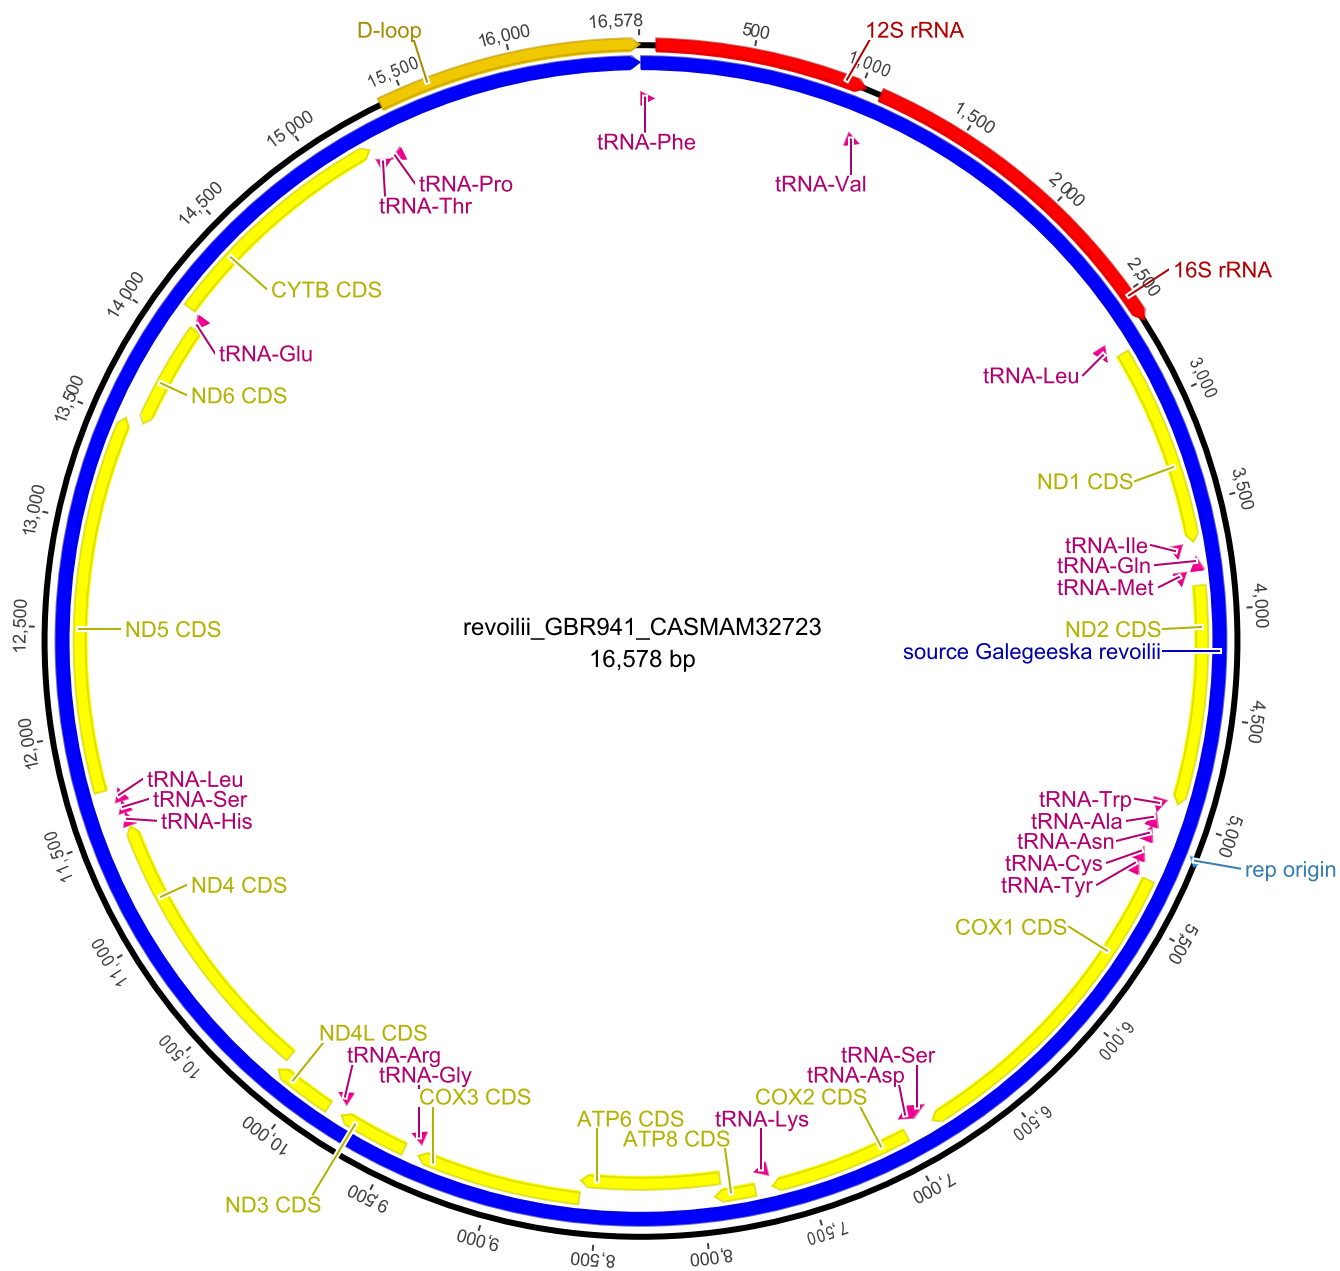

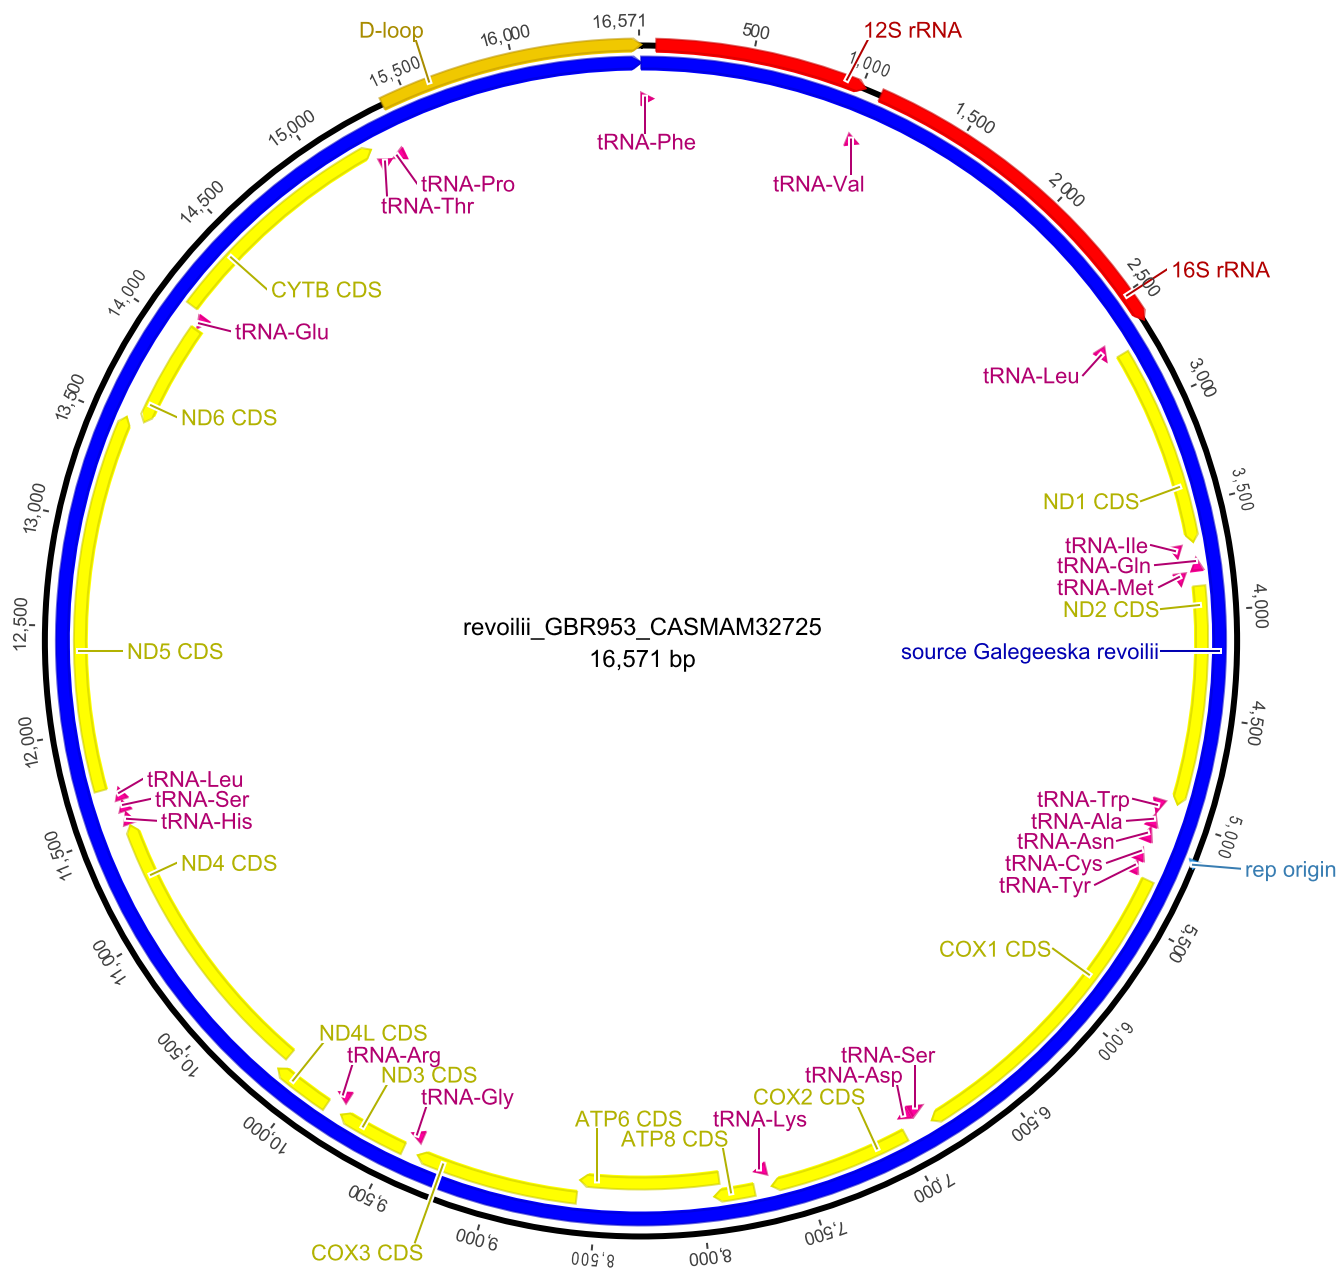

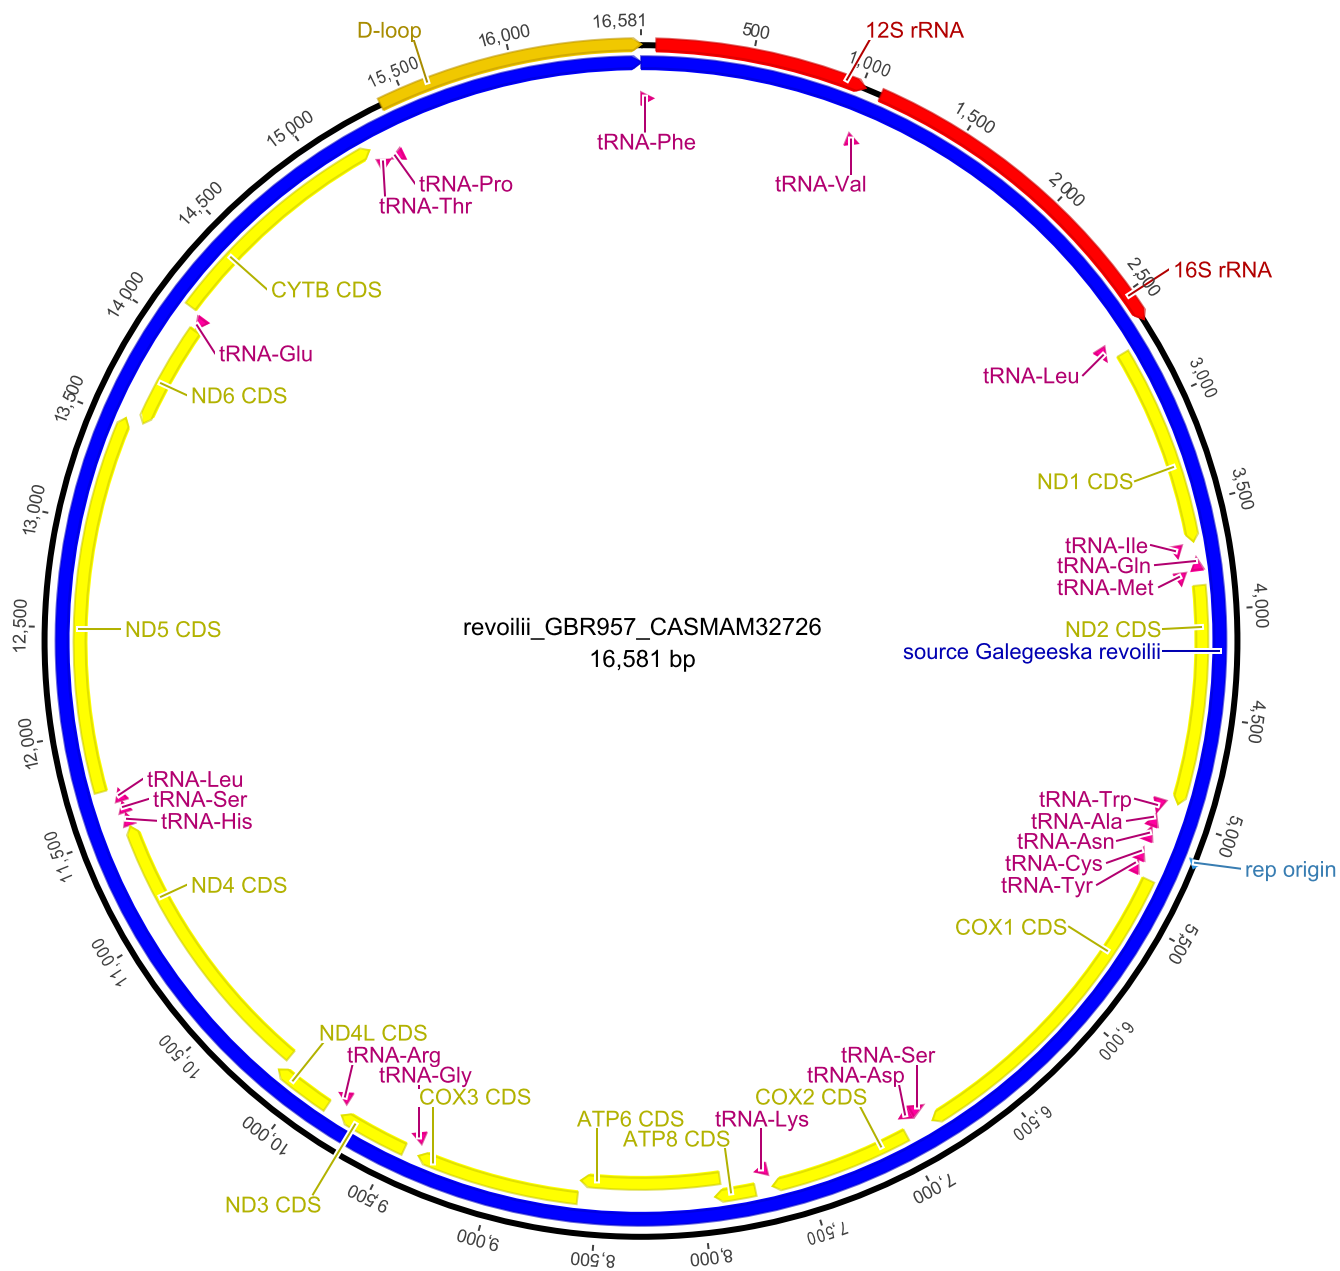

Supplement: Supplemental_Data_S3_v2.zip [file Supplemental_Data_S3_v2.zip]
